1 **Uneven distribution of cobamide biosynthesis and dependence in bacteria predicted by**  
2 **comparative genomics**

3

4 Running title: Cobamide biosynthesis predictions

5

6 Amanda N. Shelton<sup>1</sup>, Erica C. Seth<sup>1</sup>, Kenny C. Mok<sup>1</sup>, Andrew W. Han<sup>2</sup>, Samantha N. Jackson<sup>3,4</sup>,

7 David R. Haft<sup>3</sup>, Michiko E. Taga<sup>1\*</sup>

8

9 <sup>1</sup> Department of Plant & Microbial Biology, University of California, Berkeley, Berkeley, CA,

10 USA

11 <sup>2</sup> Second Genome, Inc., South San Francisco, CA, USA

12 <sup>3</sup> J. Craig Venter Institute, Rockville, MD, USA

13 <sup>4</sup> Current address: Department of Biological & Environmental Engineering, Cornell University,

14 Ithaca, NY, USA

15

16 \* Address correspondence to Michiko E. Taga, [taga@berkeley.edu](mailto:taga@berkeley.edu)

17

18

19 --

20 **Abstract**

21

22 The vitamin B<sub>12</sub> family of cofactors known as cobamides are essential for a variety of microbial

23 metabolisms. We used comparative genomics of 11,000 bacterial species to analyze the extent

24 and distribution of cobamide production and use across bacteria. We find that 86% of bacteria in  
25 this data set have at least one of 15 cobamide-dependent enzyme families, yet only 37% are  
26 predicted to synthesize cobamides *de novo*. The distribution of cobamide biosynthesis varies at  
27 the phylum level, with 57% of Actinobacteria, 45% of Proteobacteria, and 30% of Firmicutes,  
28 and less than 1% of Bacteroidetes containing the complete biosynthetic pathway. Cobamide  
29 structure could be predicted for 58% of cobamide-producing species, based on the presence of  
30 signature lower ligand biosynthesis and attachment genes. Our predictions also revealed that  
31 17% of bacteria that have partial biosynthetic pathways, yet have the potential to salvage  
32 cobamide precursors. These include a newly defined, experimentally verified category of  
33 bacteria lacking the first step in the biosynthesis pathway. These predictions highlight the  
34 importance of cobamide and cobamide precursor crossfeeding as examples of nutritional  
35 dependencies in bacteria.

36

37

38 --

39

40

## 41 **Introduction**

42           Microorganisms almost universally reside in complex communities where individual  
43 members interact with each other through physical and chemical networks. A major type of  
44 chemical interaction is nutrient crossfeeding, in which microbes that lack the ability to synthesize  
45 particular required nutrients (termed auxotrophs) obtain these nutrients from other organisms in  
46 their community (Seth and Taga, 2014). By understanding which organisms require nutrients and  
47 which can produce them, we can predict specific metabolic interactions between members of a  
48 microbial community (Abreu and Taga, 2016). With the development of next-generation  
49 sequencing, the genome sequences of tens of thousands of bacteria from diverse environments  
50 are now available, leading to the possibility of predicting community interactions based on the  
51 genomes of individual members. However, the power to predict the metabolism of an organism  
52 by analyzing its genome remains limited.

53           The critical roles of cobamides (the vitamin B<sub>12</sub> family of enzyme cofactors) in the  
54 metabolism of humans and diverse microbes has long been appreciated. Only recently, however,  
55 has cobamide-dependent metabolism been recognized as a potential mediator of microbial  
56 interactions (Degnan *et al.*, 2014b; Seth and Taga, 2014). Cobamides are used in a variety of  
57 enzymes in prokaryotes, including those involved in central metabolic processes such as carbon  
58 metabolism and the biosynthesis of methionine and deoxynucleotides (Fig. 1). Some of the  
59 functions carried out by cobamide-dependent pathways, such as acetogenesis via the Wood-  
60 Ljungdahl pathway in anaerobic environments, can be vital in shaping microbial communities  
61 (Ragsdale and Pierce, 2008). Cobamides are also used for processes that are important for human  
62 use, such as reductive dehalogenation and natural product synthesis (Banerjee and Ragsdale,  
63 2003; Broderick *et al.*, 2014).

64 *De novo* cobamide biosynthesis involves approximately 30 steps (Warren *et al.*, 2002),  
65 and the pathway can be divided into several segments (Fig. 2). The first segment, tetrapyrrole  
66 precursor biosynthesis, contains the first five steps of the pathway, most of which are also  
67 common to the biosynthesis of heme, chlorophyll, and other tetrapyrroles. The next segment,  
68 corrin ring biosynthesis, is divided into oxygen-sensitive (anaerobic) and oxygen-dependent  
69 (aerobic) routes, depending on the organism. These two alternative pathways then converge at a  
70 late intermediate, which is further modified to form the cobamide (Fig. 2, nucleotide loop  
71 assembly). The latter portion of the pathway involves adenosylation of the central cobalt ion  
72 followed by the synthesis and attachment of the aminopropanol linker and lower axial ligand  
73 (Fig. 2). Investigation of cobamide crossfeeding must account for structural diversity in the  
74 lower ligand (Fig. 2B), as only a subset of cobamide cofactors can support growth of any  
75 individual organism (Yan *et al.*, 2012; Mok and Taga, 2013; Degnan *et al.*, 2014a; Helliwell *et*  
76 *al.*, 2016; Keller *et al.*, 2018). Recent work has identified many of the genetic determinants for  
77 the biosynthesis of the benzimidazole class of lower ligands (Campbell *et al.*, 2006; Taga *et al.*,  
78 2007; Gray and Escalante-Semerena, 2007; Hazra *et al.*, 2015; Mehta *et al.*, 2015) and  
79 attachment of phenolic lower ligands (Chan and Escalante-Semerena, 2011; Newmister *et al.*,  
80 2012) (Fig. 2).

81 Previous analyses of bacterial genomes have found that less than half to three fourths of  
82 prokaryotes that require cobamides are predicted to make them (Rodionov *et al.*, 2003; Zhang *et*  
83 *al.*, 2009), suggesting that cobamide crossfeeding may be widespread in microbial communities.  
84 Analyses of cobamide biosynthesis in the human gut (Degnan *et al.*, 2014a; Magnúsdóttir *et al.*,  
85 2015) and in the phylum Cyanobacteria (Helliwell *et al.*, 2016) further reinforce that cobamide-  
86 producing and cobamide-dependent bacteria coexist in nature. These studies provide valuable

87 insights into the extent of cobamide use and biosynthesis in bacteria, but are limited in the  
88 diversity and number of organisms studied and have limited prediction of cobamide structure.

89 Here, we have analyzed the genomes of over 11,000 bacterial species and generated  
90 predictions of cobamide biosynthesis, dependence, and structure. We predict that 86% of  
91 sequenced bacteria are capable of using cobamides, yet only 37% produce cobamides *de novo*.  
92 We were able to predict cobamide structure for 58% of cobamide producers. Additionally, our  
93 predictions revealed that 17% of bacteria can salvage cobamide precursors, of which we have  
94 defined a new category of bacteria that require early tetrapyrrole precursors to produce  
95 cobamides.

96

97

## 98 **Materials and Methods**

### 99 **Data set download and filtering**

100 The names, unique identifiers, and metadata for 44,802 publicly available bacterial  
101 genomes on the Joint Genome Institute's Integrated Microbial Genomes with Expert Review  
102 database (JGI/IMG-ER, <https://img.jgi.doe.gov/cgi-bin/mer/main.cgi>) (Markowitz *et al.*, 2012)  
103 classified as “finished” (accessed January 11, 2017) or “permanent draft” (accessed February 23,  
104 2017) were downloaded (Supplementary Table 1, Sheet 1). To assess genome completeness, we  
105 searched for 55 single copy gene annotations (Raes *et al.*, 2007; Brown *et al.*, 2015) using the  
106 “function profile: genomes vs functions” tool in each genome (Supplementary Table 1, Sheet 4).  
107 Completeness was measured first based on the unique number of single copy gene annotation  
108 hits (55/55 was best) and second, by the average copy number of the annotations (values closest  
109 to 1 were considered most complete) (Supplementary Table 3). We removed 2,776 genomes with

110 fewer than 45 out of 55 unique single copy genes (Supplementary Fig. 1). To filter the remaining  
111 genomes to one genome per species, we used name-based matching to create species categories,  
112 in which each unique binomial name was considered a single species. The genome with the  
113 highest unique single copy gene number and had an average single copy gene number closest to  
114 1 was chosen to represent a species. If both scores were identical the representative genome was  
115 chosen at random. For strains with genus assignments, but without species name assignments, we  
116 considered each genome to be a species. The list of species was manually curated for species  
117 duplicates caused by data entry errors (Supplementary Table 2).

118

### 119 **Detection of cobamide biosynthesis and dependence genes in genomes**

120 Annotations from Enzyme Commission (EC) numbers

121 (<http://www.sbcs.qmul.ac.uk/iubmb/enzyme/>), Pfam, TIGRFAM, Clusters of Orthologous  
122 Groups (COG), and IMG Terms (Cornish-Bowden, 2014; Finn *et al.*, 2016; Haft *et al.*, 2012;  
123 Galperin *et al.*, 2015; Markowitz *et al.*, 2012) for cobamide biosynthesis, cobamide-dependent  
124 enzymes, and cobamide-independent alternative functions were chosen. These included  
125 annotations used by Degnan *et al.* (2014a), but in other cases alternative annotations were chosen  
126 to improve specificity of the identified genes (Supplementary Table 4). For example, EC:  
127 4.2.1.30 for glycerol dehydratase identifies both cobamide-dependent and -independent  
128 isozymes, so pfam annotations specific to the cobamide-dependent version were used instead.  
129 These genes were identified in each genome using the “function profile: genomes vs functions”  
130 tool (Jan-May 2017) (Supplementary Table 1, 2 sheet 2). The gene hits were downloaded as a list  
131 of gene unique identifiers, gene locus ID, function hit, and genome name (data available upon  
132 request).

133 For genes without functional annotations in the IMGer database, we chose sequences that  
134 were genetically or biochemically characterized to use as the query genes in one-way BLASTP  
135 (Altschul *et al.*, 1997) against the filtered genomes using the IMGer “gene profile: genomes vs  
136 genes” tool, accessed Jan-May 2017 (Supplementary Table 4).

137 Output files for the cobamide genes were combined into a master file in Microsoft Excel  
138 (Supplementary Table 1, 2 sheet 2). This master file was used as input for custom python 2.7  
139 code that interpreted the presence or absence of genes as predicted phenotypes. We used  
140 Microsoft Excel and python for further analysis. Genomes were scored for the presence or  
141 absence of cobamide-dependent enzymes and alternatives (Supplementary Table 5) based on the  
142 annotations in Supplementary Table 4. We then created criteria for seven cobamide biosynthesis  
143 phenotypes: very likely cobamide producer, likely cobamide producer, possible cobamide  
144 producer, tetrapyrrole precursor salvager, cobinamide (Cbi) salvager, likely non-producer, and  
145 very likely non-producer (Supplementary Table 7) and classified genomes accordingly  
146 (Supplementary Table 5).

147 To distinguish putative phenolic lower ligand attachment *arsAB* homologs from other  
148 *cobT* homologs that are not known to produce phenolyl cobamides, IMGer entries for all genes  
149 that were annotated as *cobT* homologs were downloaded. Tandem *cobT* homologs were defined  
150 as those with sequential IMG gene IDs. This list of tandem *cobT* genes was then filtered by size  
151 to eliminate genes encoding less than 300 or more than 800 amino acid residues, indicating  
152 annotation errors (*cobT* is approximately 350 AA residues) (Supplementary Table 9). The  
153 remaining tandem *cobT* homologs were assigned as putative *arsAB* homologs.

154 To identify the anaerobic benzimidazole biosynthesis genes *bzaABCDEF*, four new  
155 hidden Markov model profiles (HMMs) were created and two preexisting ones (TIGR04386 and

156 TIGR04385) were refined. Generally, the process for generating the new HMMs involved  
157 performing a Position-Specific Iterated (PSI) BLAST search using previously classified  
158 instances of the Bza proteins aligned in Jalview (Altschul *et al.*, 1997; Waterhouse *et al.*, 2009).  
159 Due to their similarity, BzaA, BzaB, and BzaF were examined together, as were BzaD and BzaE.  
160 To help classify these sequences, Training Set Builder (TSB) was used (Haft and Haft, 2017).  
161 All six HMMs have not been assigned TIGRFAM accessions at the time of publication, but will  
162 be included in the next TIGRFAM release, and are included as Supplementary Files. Details for  
163 each protein are listed in the Supplementary Materials and Methods.

164         These protein sequences for 10591 of the filtered genomes were queried for each *bza*  
165 HMM using *hmm3search* (HMMER3.1). Hits are only reported above the trusted cutoff defined  
166 for each HMM (Supplementary Table 8). A hit for *bzaA* and *bzaB* or *bzaF* indicated that the  
167 genome had the potential to produce benzimidazole lower ligands. The specific lower ligand was  
168 predicted based on the *bza* genes present (Hazra *et al.*, 2015).

169         We used BLASTP on IMGer to search for tetrapyrrole precursor biosynthesis genes that  
170 appeared to be absent in the 201 species identified as tetrapyrrole precursor salvagers. Query  
171 sequences used were the following: *Rhodobacter sphaeroides* HemA (GenPept C49845);  
172 *Clostridium saccharobutylicum* DSM 13864 HemA, HemL, HemB, HemC, and HemD  
173 (GenBank: AGX44136.1, AGX44131.1, AGX44132.1, AGX44134.1, AGX4133.4,  
174 respectively). Since the *C. saccharobutylicum* HemD is a fusion protein with both the UroIII  
175 synthase and UroIII methyltransferases domains, we additionally searched for the *Bacillus*  
176 *subtilis* HemD, which only has the UroIII synthase activity (UniProtKB P21248.2). We visually  
177 inspected the ORFs near any BLASTP hits in the IMGer genome browser. 180 species remained



178 after this analysis (Supplementary Table 10). Genomes were classified as a particular type of  
179 tetrapyrrole precursor salvager only if they were missing all genes upstream of a precursor.

180

### 181 **Strains and growth conditions**

182 *Clostridium scindens* ATCC 35704, *Clostridium sporogenes* ATCC 15579, and  
183 *Treponema primitia* ZAS-2 (gift from Jared Leadbetter) were grown anaerobically with and  
184 without added 5-aminolevulinic acid (1 mM for *C. sporogenes* and *T. primitia*, 0.5 mM for *C.*  
185 *scindens*).

186 *Desulfotomaculum reducens* MI-1 (gift from Rizlan Bernier-Latmani), *Listeria*  
187 *monocytogenes* (gift from Daniel Portnoy), *Blautia hydrogenotrophica* DSM 10507, *Clostridium*  
188 *kluveri* DSM 555 (gift from Rolf Thauer), and *Clostridium phytofermentans* ISDg (gift from  
189 Susan Leschine) were grown anaerobically. Details of the growth conditions are listed in the  
190 Supplementary Materials and Methods.

191

### 192 **Corrinoid extraction and analysis**

193 Corrinoid extractions were performed as described (Yi *et al.*, 2012). For corrinoids  
194 extracted from 1 L cultures of *C. sporogenes*, *C. scindens*, and *T. primitia*, high performance  
195 liquid chromatography (HPLC) analysis was performed with an Agilent Series 1200 system  
196 (Agilent Technologies, Santa Clara, CA) equipped with a diode array detector with detection  
197 wavelengths set at 362 and 525 nm. 50 to 100  $\mu$ l samples were injected onto an Agilent Eclipse  
198 XDB C18 column (5  $\mu$ m, 4.6 x 150 mm) at 35  $^{\circ}$ C, with 0.5 ml min<sup>-1</sup> flow rate. Samples were  
199 separated using acidified water and methanol (0.1% formic acid) with a linear gradient of 18% to  
200 30% methanol over 20 min.

201 For all other bacteria excluding *B. hydrogenotrophica*, extracted corrinoids were  
202 analyzed as above, except with a 1.5 ml/min flow rate and a 40°C column. Corrinoids were  
203 eluted with the following method: 2% acidified methanol for 2 min, 2%-10% acidified methanol  
204 in 0.1 min, and 10-40% acidified methanol over 9 min.

205 For *B. hydrogenotrophica*, corrinoids were analyzed as above with the following  
206 changes. 10 µl samples were injected onto an Agilent Zorbax SB-Aq column (5 µm, 4.6 x 150)  
207 with 1 ml/min flow rate at 30°C. The samples were separated with a gradient of 25-34% acidified  
208 methanol over 11 minutes, followed by 34-50% over 2 min and 50-75% over 9 minutes.

209

## 210 **Results**

### 211 **Most bacteria are predicted to have at least one cobamide-dependent enzyme**

212 We surveyed publicly available bacterial genomes for 51 functions involved in cobamide  
213 biosynthesis, modification and salvage, as well as 15 cobamide-dependent enzyme families and  
214 five cobamide-independent alternative enzymes and pathways. Because most of these genes have  
215 been characterized and annotated, we used annotations from existing databases including  
216 Enzyme Commission (EC) numbers, Pfam, TIGRFAM, Clusters of Orthologous Groups (COG),  
217 and IMG Terms to identify most of these functions and used homology-based methods to  
218 identify those for which annotations were unavailable. After filtering 44,802 publicly available  
219 bacterial genomes to one genome per species and removing incomplete genomes, we had a  
220 working data set of 11,436 species (for details, see Materials and Methods).

221 Our results indicate that the capability to use cobamides is widespread in bacteria. 86% of  
222 species in the filtered data set have at least one of the 15 cobamide-dependent enzyme families  
223 shown in Fig. 1 and Supplementary Table 4, and 88% of these species have more than one

224 family (Fig. 3A). This is consistent with previous analyses of smaller data sets (Rodionov *et al.*,  
225 2003; Zhang *et al.*, 2009; Degnan *et al.*, 2014a). The four major phyla in the data set have  
226 different distributions of the number of cobamide-dependent enzyme families per genome, with  
227 the Proteobacteria and Bacteroidetes having higher mean numbers of enzyme families than the  
228 Firmicutes and Actinobacteria (Fig. 3A). The most abundant cobamide-dependent enzymes are  
229 involved in core metabolic processes such as methionine synthesis and nucleotide metabolism,  
230 whereas processes such as reductive dehalogenation and mercury methylation are less abundant  
231 (Fig. 3B, Supplementary Table 5). We also observe phylum-level differences in the relative  
232 abundance of cobamide-dependent enzyme families (Fig. 3B), most notably the nearly complete  
233 absence of epoxyqueuosine reductase in Actinobacteria. Nonetheless, the cobamide-dependent  
234 methionine synthase (MetH) and, to a lesser extent, methylmalonyl-CoA mutase (MCM) and the  
235 cobamide-dependent ribonucleotide reductase (RNR), are the most abundant cobamide-  
236 dependent enzyme families in all of the four phyla (Fig. 3B).

237 For some cobamide-dependent processes, cobamide-independent alternative enzymes or  
238 pathways also exist (Fig. 1, right side of arrows). For example, we find that the occurrence of  
239 MetH is more common than the cobamide-independent methionine synthase, MetE, but that most  
240 bacteria have both enzymes (Fig. 3C). In contrast, cobamide-independent RNRs are found more  
241 commonly than the cobamide-dependent versions, and 30% of genomes have both cobamide-  
242 dependent and -independent RNRs (Fig. 3C). The cobamide-dependent propionate (which uses  
243 MCM), ethanolamine, and glycerol/propanediol metabolisms appear more abundant than the  
244 cobamide-independent alternatives (Fig. 3C). However, the abundance of the cobamide-  
245 dependent propionate function is overestimated because the MCM category includes mutases for  
246 which cobamide-independent versions have not been found. The abundance of the latter two

247 cobamide-independent functions may be underestimated, as they were identified based on  
248 similarity to a limited number of sequences. We did not observe dramatic phylum-level  
249 differences in the relative abundances of cobamide-dependent and –independent processes  
250 (Supplementary Figure 2).

251

### 252 **37% of bacterial species are predicted to produce cobamides *de novo***

253 We analyzed the filtered data set to make informed predictions of cobamide biosynthesis  
254 to determine the extent of cobamide biosynthesis in bacteria and to identify marker genes  
255 predictive of cobamide biosynthesis. A search for genomes containing the complete pathways for  
256 anaerobic or aerobic cobamide biosynthesis, as defined in the model bacteria *Salmonella*  
257 *enterica* serovar Typhimurium and *Pseudomonas denitrificans*, respectively (Warren *et al.*,  
258 2002), revealed that few genomes contain all annotations for the complete pathway, but many  
259 contain nearly all. Some bacteria that appear to have an incomplete pathway might nonetheless  
260 be capable of cobamide biosynthesis because of poor annotation, non-homologous replacement  
261 of certain genes (McGoldrick *et al.*, 2005; Gray and Escalante-Semerena, 2010), or functional  
262 overlap of some of the enzymes. We therefore relied on experimental data on cobamide  
263 biosynthesis in diverse bacteria to inform our predictions, using 63 bacteria that are known to  
264 produce cobamides (Table 1, Supplementary Table 6), including 5 tested in this study (Table 1,  
265 bold names, Supplementary Figure 3). We identified a core set of eight functions shared by all or  
266 all except one of the genomes of cobamide-producing bacteria (Table 1, gray highlight). These  
267 core functions include three required for corrin ring biosynthesis: *cbiL*, *cbiF* and *cbiC* in the  
268 anaerobic pathway, which are orthologous to *cobI*, *cobM* and *cobH*, respectively, in the aerobic

269 pathway (Table 1, Fig. 2A). An additional five nucleotide loop assembly functions were also  
270 highly abundant in these genomes (Table 1).

271 Our analysis additionally showed that the anaerobic and aerobic corrin ring biosynthesis  
272 pathways cannot be distinguished based on their annotated gene content, presumably because  
273 portions of the two pathways share orthologous genes (Table 1; Fig. 2A, dashed lines). Even the  
274 cobalt chelatases, *cobNST* and *cbiX/cbiK*, are not exclusive to genomes with the aerobic or  
275 anaerobic pathways, respectively (Table 1). Cobalt chelatase annotations are also found in some  
276 bacteria that lack most of the corrin ring and nucleotide loop assembly genes, suggesting that  
277 there is overlap in annotations with other metal chelatases (Schubert *et al.*, 1999).

278 We next sought to predict cobamide biosynthesis capability across bacteria by analyzing  
279 the filtered genome data set by defining different levels of confidence for predicting cobamide  
280 biosynthesis (Supplementary Table 7). Annotations that are absent from the majority of genomes  
281 of experimentally verified cobamide producers (*cobR*, *pduX*, and *cobD*) (Table 1, Fig. 2A), as  
282 well as one whose role in cobamide biosynthesis has not been determined (*cobW*) (Haas *et al.*,  
283 2009) were excluded from these threshold-based definitions. We did not exclusively use the  
284 small set of core functions identified in Table 1 because a correlation between the absence of  
285 these genes and lack of cobamide biosynthesis ability has not been established. Using these  
286 threshold-based definitions, we predict that 37% of bacteria in the data set have the potential to  
287 produce cobamides (Fig. 4, black bars). 49% of species in the data set have at least one  
288 cobamide-dependent enzyme but lack a complete cobamide biosynthetic pathway. Genomes in  
289 the latter category can be further divided into non-producers, which contain fewer than five  
290 corrin ring biosynthesis genes, and precursor salvagers, which contain distinct portions of the  
291 pathway (described in a later section). The distribution of cobamide-dependent enzyme families

292 also varies based on predicted cobamide biosynthesis, with predicted cobamide producers having  
293 more cobamide-dependent enzyme families per genome than non-producers (Supplementary  
294 Figure 4).

295 To assess whether the core functions could be used as markers, the threshold-based  
296 assignments of cobamide biosynthesis were compared to the frequency of the three core corrin  
297 ring functions. The presence of each core function alone is largely consistent with the threshold-  
298 based assignments, as each is present in 99% of genomes in the producer categories and in less  
299 than 1% of the non-producers (Table 2). The presence of two or all three marker functions  
300 matches the threshold-based predictions even more closely (Table 2). The corrin ring markers  
301 chosen in Table 1 are slightly more predictive of our threshold-based cobamide biosynthesis  
302 classifications than *cbiA/cobB* (EC:6.3.5.11/EC:6.3.5.9), a previously selected marker used in  
303 environmental DNA analysis (Bertrand *et al.*, 2011); although *cbiA/cobB* was found in 99% of  
304 predicted cobamide producers, is it also present in 2.6% of predicted non-producers and 46% of  
305 precursor salvagers (Supplementary Table 5).

306 As with the cobamide-dependent enzyme families, the four major phyla in the data set  
307 have major differences in their predicted cobamide biosynthesis phenotypes (Fig. 4). Around half  
308 of Actinobacteria (57%) and Proteobacteria (45%) and 30% of Firmicutes are predicted to be  
309 cobamide producers. In contrast, only 0.6% of Bacteroidetes are predicted to produce cobamides  
310 *de novo*, yet 96% have at least one cobamide-dependent enzyme, suggesting that most members  
311 of this phylum must acquire cobamides from other organisms in their environment. In addition,  
312 Bacteroidetes have the highest relative proportion of species predicted to salvage Cbi via a  
313 partial cobamide biosynthesis pathway, and most of the tetrapyrrole precursor salvagers are  
314 Firmicutes (see later section; Supplementary Table 10), whereas very few Actinobacterial

315 species are predicted to salvage precursors (Fig. 4). These divisions reveal potential cobamide  
316 and cobamide precursor crossfeeding requirements across phyla.

317

### 318 **Predicting cobamide structure**

319 Lower ligand structure is determined by the intracellular production of lower ligand bases  
320 as well as specific features of the lower ligand attachment genes *cobT* or *arsAB* (Campbell *et al.*,  
321 2006; Taga *et al.*, 2007; Gray and Escalante-Semerena, 2007; Hazra *et al.*, 2013; Crofts *et al.*,  
322 2014a; Hazra *et al.*, 2015; Yan *et al.*, 2018; Chan and Escalante-Semerena, 2011). We first  
323 defined predictions for the biosynthesis of cobamides containing benzimidazole lower ligands  
324 (benzimidazolyl cobamides), based on the presence of genes for the biosynthesis of  
325 benzimidazoles. We used the presence of *bluB*, the aerobic synthase for the lower ligand of  
326 cobalamin, 5,6-dimethylbenzimidazole (DMB), as a marker for cobalamin production (Campbell  
327 *et al.*, 2006; Taga *et al.*, 2007; Hazra *et al.*, 2018) and found it in 25% of genomes in the data set,  
328 including those without complete cobamide biosynthesis pathways. *bluB* is most abundant in  
329 predicted cobamide-producing bacteria (Fig. 5A), particularly in Proteobacteria (Fig. 5B).

330 Anaerobic biosynthesis of DMB and three other benzimidazoles requires different  
331 combinations of the *bza* genes as shown in Figures 2A and 5C (Hazra *et al.*, 2015; Mehta *et al.*,  
332 2015). Because annotations for the majority of the *bza* genes were not available, we developed  
333 profile HMMs to search for them (see Supplementary Materials and Methods, Supplementary  
334 Files). 96 genomes contain one or more *bza* genes, and 88 of these contain either *bzaF* or both  
335 *bzaA* and *bzaB*, the first step necessary for the anaerobic biosynthesis of all four benzimidazoles  
336 (Fig. 5C, Supplementary Table 8). As seen with *bluB*, anaerobic benzimidazole biosynthesis  
337 genes are highly enriched in cobamide producers (Fig. 5A). Examining the set of *bza* genes in

338 each genome allowed us to predict the structures of cobamides produced in 86 out of the 96  
339 genomes (Fig. 5C). Based on the frequency of *bluB* and the *bza* genes, 24% of bacteria are  
340 predicted to produce cobalamin, the cobamide required by humans.

341 To predict the biosynthesis of phenolyl cobamides, we searched for genomes containing  
342 two adjacent *cobT* annotations, since the *cobT* homologs *arsA* and *arsB*, which together are  
343 necessary for activation of phenolic compounds for incorporation into a cobamide, are encoded  
344 in tandem (Chan and Escalante-Semerena, 2011). Using this definition, *arsAB* was found in only  
345 27 species, and is almost entirely restricted to the class Negativicutes in the phylum Firmicutes,  
346 which are the only bacteria reported to produce phenolyl cobamides (Stupperich and Eisinger,  
347 1989; Men *et al.*, 2014b) (Fig. 5A, B, Supplementary Table 9).

348 42% of predicted cobamide producers in the data set do not have any of the  
349 benzimidazole biosynthesis or phenolic attachment genes (Fig. 5A). However, bacteria that have  
350 the  $\alpha$ -ribazole kinase CblS (Fig. 5A, B, inner rings) and the transporter CblT (not included) are  
351 predicted to use activated forms of lower ligand bases found in the environment (Fig. 2A,  $\alpha$ -  
352 ribazole salvaging); we found CblS in 363 species (3.2%), mostly in the Firmicutes phylum (Fig.  
353 5 A, B, inner rings) (Gray and Escalante-Semerena, 2010; Mattes and Escalante-Semerena,  
354 2017). A higher proportion of bacteria, 1,041 species (9.1%), have a CbiZ annotation (Fig. 5A,  
355 B, outer rings), an amidohydrolase that cleaves the nucleotide loop, allowing cells to rebuild a  
356 cobamide with a different lower ligand (Woodson and Escalante-Semerena, 2004) (Fig. 2A,  
357 corrinoid remodeling). CbiZ is found in genomes of predicted cobamide producers and Cbi  
358 auxotrophs (see following section) (Fig. 5A), as expected based on experimental studies (Gray  
359 and Escalante-Semerena, 2009a, 2009b; Men *et al.*, 2014a; Yi *et al.*, 2012). The reliance of some



360 bacteria on exogenous lower ligands or  $\alpha$ -ribazoles produced by other organisms precludes  
361 prediction of cobamide structure in all cases.

362

### 363 **17% of bacteria have partial cobamide biosynthetic pathways**

364 Our analysis of the cobamide biosynthesis pathway revealed two categories of genomes  
365 that lack some or most genes in the pathway, but retain contiguous portions of the pathway.

366 Genomes in one category, the Cbi (cobinamide) auxotrophs (15% of genomes), contain the  
367 nucleotide loop assembly steps but lack all or most of the corrin ring biosynthesis functions. As  
368 demonstrated in *Escherichia coli* (Di Girolamo and Bradbeer, 1976), *Thermotoga lettingae*  
369 (Butzin *et al.*, 2013), and *Dehalococcoides mccartyi* (Yi *et al.*, 2012), and predicted in human  
370 gut microbes (Degnan *et al.*, 2014a), Cbi auxotrophs can take up the late intermediate Cbi,  
371 assemble the nucleotide loop and attach a lower ligand in a process called Cbi salvaging.

372 We observed an additional 201 genomes (1.7%) that lack one or more initial steps in  
373 tetrapyrrole precursor biosynthesis but have complete corrin ring biosynthesis and nucleotide  
374 loop assembly pathways, primarily in the Firmicutes (Supplementary Table 7). After searching  
375 these genomes manually for genes missing from the pathway, we designated 180 of these species  
376 as tetrapyrrole precursor salvagers, a new classification of cobamide intermediate auxotrophs  
377 (Fig. 6A, Supplementary Table 10). These organisms are predicted to produce cobamides only  
378 when provided with a tetrapyrrole precursor or a later intermediate in the pathway.

379

### 380 **Experimental validation of ALA dependence**

381 The identification of putative tetrapyrrole precursor salvagers suggests either that these  
382 bacteria are capable of taking up a tetrapyrrole precursor from the environment to produce a

383 cobamide or that they synthesize the precursors through a novel pathway. We therefore tested  
384 three putative tetrapyrrole precursor salvagers for their ability to produce corrinoids (cobamides  
385 and other corrin ring-containing compounds) in the presence and absence of a tetrapyrrole  
386 precursor. *Clostridium scindens* and *Clostridium sporogenes*, which are predicted to require 5-  
387 aminolevulinic acid (ALA), produced corrinoids in defined media only when ALA was supplied,  
388 suggesting that they do not have a novel ALA biosynthesis pathway (Fig. 6B). We tested an  
389 additional predicted ALA salvager, the termite gut bacterium *Treponema primitia* ZAS-2, for  
390 which a defined medium has not been developed. When cultured in medium containing yeast  
391 autolysate, *T. primitia* produced trace amounts of corrinoids, and corrinoid production was  
392 increased by supplementing this medium with ALA (Fig. 6B). The ability of *T. primitia* to use  
393 externally supplied ALA was further shown by its increased growth rate and cell density at  
394 stationary phase when either cobalamin or ALA was added (Fig. 6C). Together, these results  
395 support the hypothesis that predicted ALA salvagers synthesize cobamides by taking up ALA  
396 from the environment.

397

## 398 **Discussion**

399 Vitamin B<sub>12</sub> and other cobamides have long been appreciated as a required nutrient for  
400 humans, bacteria, and other organisms due to their critical function as enzyme cofactors. Prior to  
401 this work, the extent of cobamide biosynthesis and dependence across different bacterial taxa had  
402 not been investigated. The availability of tens of thousands of genome sequences afforded us the  
403 opportunity to conduct a comprehensive analysis of cobamide metabolism across over 11,000  
404 bacterial genomes. This analysis gives an overview of cobamide dependence and cobamide  
405 biosynthesis across bacteria, allowing for the generation of hypotheses for cobamide and

406 cobamide precursor crossfeeding in bacterial communities. Our work shows that cobamide use is  
407 much more widespread than cobamide biosynthesis, consistent with the majority of previous  
408 studies of smaller data sets (Rodionov *et al.*, 2003; Zhang *et al.*, 2009; Degnan *et al.*, 2014a).  
409 The prevalence of cobamide-dependent enzymes in bacteria, coupled with the relative paucity of  
410 *de novo* cobamide producers, underscores the ubiquity of both cobamide-dependent metabolism  
411 and cobamide crossfeeding in microbial communities. Here, we additionally find that cobamide  
412 production and use are unevenly distributed across the major phyla represented in the data set,  
413 identify bacteria dependent on cobamide precursors, and predict cobamide structure. These  
414 results underscore the widespread nutritional dependence of bacteria.

415         The most abundant types of cobamide-dependent enzymes in our data set are methionine  
416 synthase, epoxyqueuosine reductase, RNR, and MCM. For all of these enzymes, cobamide-  
417 independent alternative enzymes or pathways exist. (Note that the newly discovered alternative  
418 to epoxyqueuosine reductase, QueH (Zallot *et al.*, 2017), was not included in our analysis.) The  
419 prevalence of cobamide-dependent enzymes for which cobamide-independent counterparts exist,  
420 particularly in the same genome, suggests that cobamide-dependent enzymes confer distinct  
421 advantages. This view is supported by the observations that MetE is sensitive to stress and has a  
422 100-fold lower turnover number than MetH (Hondorp and Matthews, 2004; Xie *et al.*, 2013;  
423 Gonzalez *et al.*, 1992) and that cobamide-independent RNRs are limited in the oxygen  
424 concentrations in which they are active (Taga and Walker, 2010; Fontecave, 1998)

425         In our analysis of cobamide biosynthesis, it was not possible to use a single definition of  
426 the complete *de novo* cobamide biosynthesis pathway across all bacterial genomes because of  
427 divergence in sequence and function. The use of experimental data gives confidence to our  
428 predictions and allowed identification of marker genes for cobamide biosynthesis. Nevertheless,

429 our predictions likely overestimate the extent of cobamide biosynthesis *in situ*, as genome  
430 predictions do not account for differences in gene expression. For example, cobamide production  
431 in *S. typhimurium* is repressed in environments containing oxygen or lacking propanediol (Roth  
432 *et al.*, 1996), and cobamide biosynthesis operons are commonly subjected to negative regulation  
433 by riboswitches (Nahvi, 2004; Rodionov *et al.*, 2003). The abundance of cobamide importers  
434 (Rodionov *et al.*, 2003; Zhang *et al.*, 2009; Degnan *et al.*, 2014a), even in bacteria capable of  
435 cobamide biosynthesis, reinforces the possibility that many bacteria may repress expression of  
436 cobamide biosynthesis genes in favor of cobamide uptake in some environments.

437         A comparison of genomes containing one or more cobamide-dependent functions to  
438 those with none revealed an absence of bacteria that produce cobamides but do not use them.  
439 This finding suggests that altruistic bacteria that produce cobamides exclusively for others do not  
440 exist. Metabolically coupled organisms that crossfeed cobalamin in exchange for another nutrient  
441 have been described in the mutualistic relationships between algae and cobalamin-producing  
442 bacteria (Croft *et al.*, 2005; Kazamia *et al.*, 2012), yet it remains unclear if such intimate  
443 partnerships are widespread. Notably, our results show that cobamide biosynthesis is unevenly  
444 distributed across bacteria, with Actinobacteria enriched in and Bacteroidetes lacking in *de novo*  
445 cobamide biosynthesis. Such phylogenetic comparisons can be used to make crude predictions of  
446 cobamide crossfeeding relationships among different taxa.

447         The reliance of many bacteria on cobamide crossfeeding, coupled with the fact that  
448 structurally different cobamides are not functionally equivalent in bacteria (Yan *et al.*, 2012;  
449 Mok and Taga, 2013; Degnan *et al.*, 2014a; Helliwell *et al.*, 2016; Keller *et al.*, 2018),  
450 underscores the importance of cobamide structure in microbial interactions. The structural  
451 differences in cobamides are almost exclusively limited to variations in the lower ligand (Fig.

452 2B). Additional variation in the nucleotide loop was not considered here because of the absence  
453 of genes specific to norcobamide biosynthesis (Kräutler *et al.*, 2003; Keller *et al.*, 2016). We  
454 were able to predict lower ligand structure for 58% of predicted cobamide producers. The  
455 remaining bacteria may produce purinyl cobamides, which are abundant in some bacterial taxa  
456 and microbial communities (Helliwell *et al.*, 2016; Allen and Stabler, 2008). Further analysis of  
457 substrate specificity in CobT and other lower ligand attachment enzymes could lead to improved  
458 strategies for predicting purinyl cobamide production, as some CobT homologs appear to  
459 segregate into different clades based on lower ligand structure (Hazra *et al.*, 2013; Crofts *et al.*,  
460 2013; Yan *et al.*, 2018). The presence of free benzimidazoles and  $\alpha$ -ribazoles in microbial  
461 communities (Crofts *et al.*, 2014b; Johnson *et al.*, 2016; Wienhausen *et al.*, 2017) and the ability  
462 of bacteria to take up and incorporate these compounds into cobamides (Anderson *et al.*, 2008;  
463 Mok and Taga, 2013; Keller *et al.*, 2013; Crofts *et al.*, 2013) suggest that it will not be possible  
464 to predict the structures of cobamides produced by all bacteria *in situ* solely from genomic  
465 analysis.

466 We predict that 32% of cobamide-dependent bacteria are unable to synthesize cobamides,  
467 attach a preferred lower ligand to Cbi, or remodel corrinoids. This group of bacteria must take up  
468 cobamides from their environment for use in their cobamide-dependent metabolisms. Given the  
469 variable use of structurally different cobamides by different bacteria, the availability of specific  
470 cobamides is likely critical to bacteria that are unable to synthesize cobamides or alter their  
471 structure. The availability of preferred cobamides may limit the range of environments that these  
472 organisms can inhabit. Variation in the abundance of different cobamides has been observed in  
473 different environments. For example, in a TCE-contaminated groundwater enrichment culture, 5-  
474 hydroxybenzimidazolyl cobamide and *p*-cresolyl cobamide were the most abundant cobamides

475 (Men *et al.*, 2014b), compared to cobalamin in bovine rumen (Girard *et al.*, 2009) and 2-  
476 methyladeninyl cobamide in human stool (Allen and Stabler, 2008). One strategy for acquiring  
477 preferred cobamides could be selective cobamide import, as suggested by the ability of two  
478 cobamide transporters in *Bacteroides thetaiotaomicron* to distinguish between different  
479 cobamides (Degnan *et al.*, 2014a).

480 Dependence on biosynthetic precursors has been observed or predicted for amino acids,  
481 nucleotides, and the cofactors thiamin and folate (Sloan and Moran, 2012; Kilstrup *et al.*, 2005;  
482 Paerl *et al.*, 2016; de Crécy-Lagard *et al.*, 2007). Here, we describe genomic evidence for  
483 dependence on cobamide precursors, namely Cbi or tetrapyrrole precursors. The prevalence of  
484 Cbi-salvaging bacteria suggests that it is common for bacteria to fulfill their cobamide  
485 requirements by importing Cbi from the environment and assembling the nucleotide loop  
486 intracellularly. Consistent with this, Cbi represented up to 9% of total corrinoids in TCE-  
487 contaminated groundwater enrichments (Men *et al.*, 2014b), and represented up to 12.8% of the  
488 total corrinoids detected in human stool samples (Allen and Stabler, 2008).

489 Our analysis defined five types of tetrapyrrole precursor salvagers and experimentally  
490 verified the ALA salvager phenotype in three species. Bacteria that lack tetrapyrrole precursor  
491 biosynthesis genes but contain the remainder of the cobamide biosynthetic pathway were  
492 overlooked in previous genomic studies of cobamide biosynthesis that considered only the corrin  
493 ring biosynthesis and nucleotide loop assembly the portions of the pathway (Rodionov *et al.*,  
494 2003; Zhang *et al.*, 2009; Magnúsdóttir *et al.*, 2015; Helliwell *et al.*, 2016). Tetrapyrrole  
495 precursors have been detected in biological samples, suggesting that they are available for uptake  
496 in some environments. For example, UroIII was detected in human stool (Dobriner, 1937;  
497 Watson *et al.*, 1945) and ALA has been found in swine manure extract (Kanto *et al.*, 2013).

498 Although we confirmed experimentally the ALA dependence phenotype, we were unable to  
499 detect ALA in several biological samples using a standard chemical assay or bioassay,  
500 suggesting either that ALA is not freely available in these environments or is present at  
501 concentrations lower than the 100 nM detection limit of these assays (data not shown). Based on  
502 the ecosystem assignment information available for 48% of the genomes, 78% of tetrapyrrole  
503 precursor salvagers are categorized as host-associated bacteria compared to 41% in the complete  
504 filtered dataset. One interpretation of this finding is that tetrapyrrole precursors are provided by  
505 the host, either from host cells that produce them as intermediates in heme biosynthesis  
506 (Sangwan and O'Brian, 1991; Lyell *et al.*, 2017) or, for gut-associated microbes, as part of the  
507 host's diet. Alternatively, these precursors may be provided by other microbes, as was observed  
508 in a coculture of *Fibrobacter* species (Qi *et al.*, 2008). Genome analysis suggests that Candidatus  
509 *Hodgkina cicadicola*, a predicted Uroporphyrinogen III (UroIII) salvager (McCutcheon *et al.*,  
510 2009), may acquire a tetrapyrrole precursor from its insect host or other endosymbionts to be  
511 able to provide methionine for itself and its host via the cobamide-dependent methionine  
512 synthase. 17% of cobamide-requiring human gut bacteria lacked genes to make UroIII de novo  
513 from glutamate, suggesting they could be UroIII salvagers (Degnan *et al.*, 2014a).

514 Nutritional dependence is nearly universal in bacteria. Auxotrophy for B vitamins, amino  
515 acids, and nucleic acids is so common that these nutrients are standard components of bacterial  
516 growth media. We speculate that the availability of cobamides in the environment, coupled with  
517 the relative metabolic cost of cobamide biosynthesis, has driven selection for loss of the  
518 cobamide biosynthesis pathway (Morris *et al.*, 2012). The large number of genomes with partial  
519 cobamide biosynthesis pathways, namely in the “possible cobamide biosynthesis”, “likely non-  
520 producer”, and “Cbi salvager” classifications, suggests that some of these genomes are in the

521 process of losing the cobamide biosynthesis pathway. At the same time, evidence for horizontal  
522 acquisition of the cobamide biosynthesis pathway suggests an adaptive advantage for nutritional  
523 independence for some bacteria (Morita *et al.*, 2008; Lawrence and Roth, 1996). Such  
524 advantages could include early colonization of an environmental niche, ability to synthesize  
525 cobamides with lower ligands that are not commonly available, or association with hosts that do  
526 not produce cobamides. The analysis of the genomic potential of bacteria for cobamide use and  
527 production presented here could provide a foundation for future studies of the evolution and  
528 ecology of cobamide interdependence.

529

### 530 **Acknowledgments**

531 This work was supported by NIH grant AI117984 and a Hellman Family Faculty Fund award to  
532 M.E.T., a Grace Kase Graduate Fellowship to A.N.S., and an NSF Graduate Fellowship to  
533 E.C.S, and NSF grant No. 1458808 to the J. Craig Venter Institute.

534

535 We thank Alison Smith, Johan Kudahl, Jared Leadbetter, and members of the Taga lab for  
536 helpful advice. We thank Olga Sokolovskaya, Sebastian Gude, Zachary Hallberg, and Alexa  
537 Nicolas for critical reading for this manuscript.

538

539 We thank Jared Leadbetter, Rizlan Bernier-Latmani, Daniel Portnoy, Rolf Thauer, and Susan  
540 Leschine for providing bacterial strains.

541

### 542 **Contributions**



543 A.N.S., E.C.S., and A.W.H. performed the bioinformatic analysis. S.N.J. and D.R.H. created the  
544 BzaABCDEF HMMs. K.C.M., E.C.S., and A.N.S. performed growth assays and corrinoid  
545 extractions.

546

#### 547 **Conflict of Interest**

548 The authors declare no conflict of interest.

549

#### 550 **References**

551 Abreu NA, Taga ME. (2016). Decoding molecular interactions in microbial communities. *FEMS*  
552 *Microbiol Rev* **40**: 648–663.

553 Allen RH, Stabler SP. (2008). Identification and quantitation of cobalamin and cobalamin  
554 analogues in human feces. *Am J Clin Nutr* **87**: 1324–1335.

555 Altschul SF, Madden TL, Schäffer AA, Zhang J, Zhang Z, Miller W, *et al.* (1997). Gapped  
556 BLAST and PSI-BLAST: A new generation of protein database search programs. *Nucleic*  
557 *Acids Res* **25**: 3389–3402.

558 Anderson PJ, Lango J, Carkeet C, Britten A, Kräutler B, Hammock BD, *et al.* (2008). One  
559 pathway can incorporate either adenine or dimethylbenzimidazole as an alpha-axial  
560 ligand of B<sub>12</sub> cofactors in *Salmonella enterica*. *J Bacteriol* **190**: 1160–71.

561 Banerjee R, Ragsdale SW. (2003). THE MANY FACES OF VITAMIN B<sub>12</sub>: CATALYSIS BY  
562 COBALAMIN-DEPENDENT ENZYMES. *Annu Rev Biochem* **72**: 209–247.

563 Bertrand EM, Saito MA, Jeon YJ, Neilan BA. (2011). Vitamin B<sub>12</sub> biosynthesis gene diversity in  
564 the Ross Sea: the identification of a new group of putative polar B<sub>12</sub> biosynthesizers.  
565 *Environ Microbiol* **13**: 1285–98.

- 566 Broderick JB, Du BR, Duschene KS, Shepard EM. (2014). Radical S - Adenosylmethionine  
567 Enzymes. *Chem Rev* **114**: 4229–4317.
- 568 Brown CT, Hug LA, Thomas BC, Sharon I, Castelle CJ, Singh A, *et al.* (2015). Unusual biology  
569 across a group comprising more than 15% of domain Bacteria. *Nature* **523**: 208–211.
- 570 Butzin NC, Secinaro MA, Swithers KS, Gogarten JP, Noll KM. (2013). *Thermotoga lettingae*  
571 can salvage cobinamide to synthesize vitamin B<sub>12</sub>. *Appl Environ Microbiol* **79**: 7006–12.
- 572 Campbell GRO, Taga ME, Mistry K, Lloret J, Anderson PJ, Roth JR, *et al.* (2006).  
573 *Sinorhizobium meliloti* bluB is necessary for production of 5,6-dimethylbenzimidazole,  
574 the lower ligand of B<sub>12</sub>. *Proc Natl Acad Sci* **103**: 4634–4639.
- 575 Chan CH, Escalante-Semerena JC. (2011). ArsAB, a novel enzyme from *Sporomusa ovata*  
576 activates phenolic bases for adenosylcobamide biosynthesis. *Mol Microbiol* **81**: 952–967.
- 577 Cornish-Bowden A. (2014). Current IUBMB recommendations on enzyme nomenclature and  
578 kinetics. *Perspect Sci* **1**: 74–87.
- 579 de Crécy-Lagard V, El Yacoubi B, de la Garza RD, Noiriél A, Hanson AD. (2007). Comparative  
580 genomics of bacterial and plant folate synthesis and salvage: Predictions and validations.  
581 *BMC Genomics* **8**. e-pub ahead of print, doi: 10.1186/1471-2164-8-245.
- 582 Croft MT, Lawrence AD, Raux-Deery E, Warren MJ, Smith AG. (2005). Algae acquire vitamin  
583 B<sub>12</sub> through a symbiotic relationship with bacteria. *Nature* **438**: 90–3.
- 584 Crofts TS, Hazra AB, Tran JLA, Sokolovskaya OM, Osadchiy V, Ad O, *et al.* (2014a).  
585 Regiospecific Formation of Cobamide Isomers Is Directed by CobT. *Biochemistry* **53**:  
586 7805–7815.
- 587 Crofts TS, Men Y, Alvarez-Cohen L, Taga ME. (2014b). A bioassay for the detection of  
588 benzimidazoles reveals their presence in a range of environmental samples. *Front*

- 589           *Microbiol* **5**: 592.
- 590 Crofts TS, Seth EC, Hazra AB, Taga ME. (2013). Cobamide structure depends on both lower  
591           ligand availability and CobT substrate specificity. *Chem Biol* **20**: 1265–1274.
- 592 Degnan PH, Barry NA, Mok KC, Taga ME, Goodman AL. (2014a). Human gut microbes use  
593           multiple transporters to distinguish vitamin B<sub>12</sub> analogs and compete in the gut. *Cell Host*  
594           *Microbe* **15**: 47–57.
- 595 Degnan PH, Taga ME, Goodman AL. (2014b). Vitamin B<sub>12</sub> as a Modulator of Gut Microbial  
596           Ecology. *Cell Metab* **20**: 769–778.
- 597 Dobriner K. (1937). Porphyrin Excretion in the Feces in Normal and Pathological Conditions. *J*  
598           *Biol Chem* **120**: 115–128.
- 599 Eddy, SR. (2015). HMMER: biosequence analysis using profile hidden Markov models (v3.1b2)  
600           [software]. Available from <http://hmmer.org/>
- 601 Finn RD, Cogill P, Eberhardt RY, Eddy SR, Mistry J, Mitchell AL, *et al.* (2016). The Pfam  
602           protein families database: Towards a more sustainable future. *Nucleic Acids Res* **44**:  
603           D279–D285.
- 604 Fontecave M. (1998). Ribonucleotide reductases and radical reactions. *Cell Mol Life Sci* **54**:  
605           684–695.
- 606 Galperin MY, Makarova KS, Wolf YI, Koonin E V. (2015). Expanded microbial genome  
607           coverage and improved protein family annotation in the COG database. *Nucleic Acids*  
608           *Res* **43**: D261–D269.
- 609 Girard CL, Santschi DE, Stabler SP, Allen RH. (2009). Apparent ruminal synthesis and intestinal  
610           disappearance of vitamin B<sub>12</sub> and its analogs in dairy cows. *J Dairy Sci* **92**: 4524–4529.
- 611 Di Girolamo PM, Bradbeer C. (1976). Transport of vitamin B<sub>12</sub> in Escherichia coli. *J Bacteriol*

- 612           **106**: 745–750.
- 613   Gonzalez JC, Banerjee R V., Huang S, Sumner JS, Matthews RG. (1992). Comparison of  
614           Cobalamin-independent and Cobalamin-Dependent Methionine Synthases from  
615           Escherichia coli : Two Solutions to the Same Chemical Problem. *Biochemistry* **31**: 6045–  
616           6056.
- 617   Gray MJ, Escalante-Semerena JC. (2010). A new pathway for the synthesis of alpha-ribazole-  
618           phosphate in *Listeria innocua*. *Mol Microbiol* **77**: 1429–1438.
- 619   Gray MJ, Escalante-Semerena JC. (2009a). In vivo analysis of cobinamide salvaging in  
620           *Rhodobacter sphaeroides* strain 2.4.1. *J Bacteriol* **191**: 3842–51.
- 621   Gray MJ, Escalante-Semerena JC. (2007). Single-enzyme conversion of FMNH<sub>2</sub> to 5, 6-  
622           dimethylbenzimidazole the lower ligand of B<sub>12</sub>. *Proc Natl Acad Sci* **104**: 2921–2926.
- 623   Gray MJ, Escalante-Semerena JC. (2009b). The cobinamide amidohydrolase (cobyrinic acid-  
624           forming) CbiZ enzyme: A critical activity of the cobamide remodelling system of  
625           *Rhodobacter sphaeroides*. *Mol Microbiol* **74**: 1198–1210.
- 626   Haas CE, Rodionov DA, Kropat J, Malasarn D, Merchant SS, de Crécy-Lagard V. (2009). A  
627           subset of the diverse COG0523 family of putative metal chaperones is linked to zinc  
628           homeostasis in all kingdoms of life. *BMC Genomics* **10**: 470.
- 629   Haft DH, Selengut JD, Richter RA, Harkins D, Basu MK, Beck E. (2012). TIGRFAMs and  
630           genome properties in 2013. *Nucleic Acids Res* **41**: 387–395.
- 631   Haft DR, Haft DH. (2017). A comprehensive software suite for protein family construction and  
632           functional site prediction. *PLoS One* **12**: e0171758.
- 633   Hazra AB, Ballou DP, Taga ME. (2018). Unique Biochemical and Sequence Features Enable  
634           BluB to Destroy Flavin and Distinguish BluB from the Flavin Monooxygenase

- 635 Superfamily. *Biochemistry* **57**: 1748–1757.
- 636 Hazra AB, Han AW, Mehta AP, Mok KC, Osadchiy V, Begley TP, *et al.* (2015). Anaerobic  
637 biosynthesis of the lower ligand of vitamin B<sub>12</sub>. *Proc Natl Acad Sci* **112**: 10792–7.
- 638 Hazra AB, Tran JLA, Crofts TS, Taga ME. (2013). Analysis of substrate specificity in CobT  
639 homologs reveals widespread preference for DMB, the lower axial ligand of vitamin B<sub>12</sub>.  
640 *Chem Biol* **20**: 1275–1285.
- 641 Helliwell KE, Lawrence AD, Holzer A, Kudahl UJ, Sasso S, Kräutler B, *et al.* (2016).  
642 Cyanobacteria and Eukaryotic Algae Use Different Chemical Variants of Vitamin B<sub>12</sub>.  
643 *Curr Biol* **26**: 999–1008.
- 644 Hondorp ER, Matthews RG. (2004). Oxidative stress inactivates cobalamin-independent  
645 methionine synthase (MetE) in *Escherichia coli*. *PLoS Biol* **2**: e336.
- 646 Ivanova EG, Fedorov DN, Doronina N V, Trotsenko YA. (2006). Production of vitamin B<sub>12</sub> in  
647 aerobic methylotrophic bacteria. *Microbiology* **75**: 494–496.
- 648 Johnson WM, Kido Soule MC, Kujawinski EB. (2016). Evidence for quorum sensing and  
649 differential metabolite production by a marine bacterium in response to DMSP. *ISME J*  
650 **10**: 2304–2316.
- 651 Kanto U, Jutamane K, Osotsapar Y, Chai-arree W, Jintanawich W, Promdang S, *et al.* (2013).  
652 Quantification of 5-aminolevulinic acid in swine manure extract by HPLC-fluorescence.  
653 *J Liq Chromatogr Relat Technol* **36**: 2731–2748.
- 654 Kazamia E, Czesnick H, Nguyen TT Van, Croft MT, Sherwood E, Sasso S, *et al.* (2012).  
655 Mutualistic interactions between vitamin B<sub>12</sub> -dependent algae and heterotrophic bacteria  
656 exhibit regulation. *Environ Microbiol* **14**: 1466–76.
- 657 Keller S, Kunze C, Bommer M, Paetz C, Menezes RC, Svatoš A, *et al.* (2018). Selective

- 658 Utilization of Benzimidazolyl-Norcobamides as Cofactors by the Tetrachloroethene  
659 Reductive Dehalogenase of *Sulfurospirillum multivorans*. *J Bacteriol* **200**: e00584-17.
- 660 Keller S, Ruetz M, Kunze C, Kräutler B, Diekert G, Schubert T. (2013). Exogenous 5,6-  
661 dimethylbenzimidazole caused production of a non-functional tetrachloroethene  
662 reductive dehalogenase in *Sulfurospirillum multivorans*. *Environ Microbiol* **16**: 3361–  
663 3369.
- 664 Keller S, Treder A, Von Reuss SH, Escalante-Semerena JC, Schubert T. (2016). The  
665 SMUL\_1544 gene product governs norcobamide biosynthesis in the tetrachloroethene-  
666 respiring bacterium *Sulfurospirillum multivorans*. *J Bacteriol* **198**: 2236–2243.
- 667 Kilstrup M, Hammer K, Jensen PR, Martinussen J. (2005). Nucleotide metabolism and its  
668 control in lactic acid bacteria. *FEMS Microbiol Rev* **29**: 555–590.
- 669 Kräutler B, Fieber W, Ostermann S, Fasching M, Ongania KH, Gruber K, *et al.* (2003). The  
670 Cofactor of Tetrachloroethene Reductive Dehalogenase of *Dehalospirillum multivorans*  
671 Is Norpseudob<sub>12</sub>, a New Type of a Natural Corrinoid. *Helv Chim Acta* **86**: 3698–3716.
- 672 Lawrence J, Roth J. (1996). Evolution of coenzyme B<sub>12</sub> synthesis among enteric bacteria:  
673 evidence for loss and reacquisition of a multigene complex. *Genetics* **142**: 11–24.
- 674 Lyell NL, Septer AN, Dunn AK, Duckett D, Stoudenmire JL, Stabb E V. (2017). An expanded  
675 transposon mutant library reveals that *Vibrio fischeri*  $\delta$ -aminolevulinate auxotrophs can  
676 colonize *Euprymna scolopes*. *Appl Environ Microbiol* **83**: e02470-16.
- 677 Magnúsdóttir S, Ravcheev D, de Crécy-Lagard V, Thiele I. (2015). Systematic genome  
678 assessment of B-vitamin biosynthesis suggests co-operation among gut microbes. *Front*  
679 *Genet* **6**: 148.
- 680 Markowitz VM, Chen I-MA, Palaniappan K, Chu K, Szeto E, Grechkin Y, *et al.* (2012). IMG:

- 681 The integrated microbial genomes database and comparative analysis system. *Nucleic*  
682 *Acids Res* **40**: D115–D122.
- 683 Mattes TA, Escalante-Semerena JC. (2017). Salmonella enterica synthesizes 5,6-  
684 dimethylbenzimidazolyl-(DMB)- $\alpha$ -riboside. Why some Firmicutes do not require the  
685 canonical DMB activation system to synthesize adenosylcobalamin. *Mol Microbiol* **103**:  
686 269–281.
- 687 McCutcheon JP, McDonald BR, Moran NA. (2009). Convergent evolution of metabolic roles in  
688 bacterial co-symbionts of insects. *Proc Natl Acad Sci* **106**: 15394–15399.
- 689 McGoldrick HM, Roessner CA, Raux E, Lawrence AD, McLean KJ, Munro AW, *et al.* (2005).  
690 Identification and characterization of a novel vitamin B<sub>12</sub> (cobalamin) biosynthetic  
691 enzyme (CobZ) from Rhodobacter capsulatus, containing flavin, heme, and Fe-S  
692 cofactors. *J Biol Chem* **280**: 1086–1094.
- 693 Mehta AP, Abdelwahed SH, Fenwick MK, Hazra AB, Taga ME, Zhang Y, *et al.* (2015).  
694 Anaerobic 5-Hydroxybenzimidazole Formation from Aminoimidazole Ribotide: An  
695 Unanticipated Intersection of Thiamin and Vitamin B<sub>12</sub> Biosynthesis. *J Am Chem Soc*  
696 **137**: 10444–10447.
- 697 Men Y, Seth EC, Yi S, Allen RH, Taga ME, Alvarez-Cohen L. (2014a). Sustainable growth of  
698 Dehalococcoides mccartyi 195 by corrinoid salvaging and remodeling in defined lactate-  
699 fermenting consortia. *Appl Environ Microbiol* **80**: 2133–2141.
- 700 Men Y, Seth EC, Yi S, Crofts TS, Allen RH, Taga ME, *et al.* (2014b). Identification of specific  
701 corrinoids reveals corrinoid modification in dechlorinating microbial communities.  
702 *Environ Microbiol* **17**: 4873–4884.
- 703 Mok KC, Taga ME. (2013). Growth inhibition of Sporomusa ovata by incorporation of

- 704 benzimidazole bases into cobamides. *J Bacteriol* **195**: 1902–11.
- 705 Morita H, Toh H, Fukuda S, Horikawa H, Oshima K, Suzuki T, *et al.* (2008). Comparative  
706 genome analysis of *Lactobacillus reuteri* and *Lactobacillus fermentum* reveal a genomic  
707 island for reuterin and cobalamin production. *DNA Res* **15**: 151–161.
- 708 Morris JJ, Lenski RE, Zinser ER. (2012). The black queen hypothesis: Evolution of  
709 dependencies through adaptive gene loss. *MBio* **3**: e00036-12.
- 710 Nahvi A. (2004). Coenzyme B<sub>12</sub> riboswitches are widespread genetic control elements in  
711 prokaryotes. *Nucleic Acids Res* **32**: 143–150.
- 712 Newmister SA, Chan CH, Escalante-Semerena JC, Rayment I. (2012). Structural insights into  
713 the function of the nicotinate mononucleotide:phenol/p-cresol phosphoribosyltransferase  
714 (ArsAB) enzyme from *Sporomusa ovata*. *Biochemistry* **51**: 8571–8582.
- 715 Paerl RW, Bouget F-Y, Lozano J-C, Vergé V, Schatt P, Allen EE, *et al.* (2016). Use of plankton-  
716 derived vitamin B1 precursors, especially thiazole-related precursor, by key marine  
717 picoeukaryotic phytoplankton. *ISME J* **11**: 753–765.
- 718 Qi M, Nelson KE, Daugherty SC, Nelson WC, Hance IR, Morrison M, *et al.* (2008). Genomic  
719 differences between *Fibrobacter succinogenes* S85 and *Fibrobacter intestinalis* DR7,  
720 identified by suppression subtractive hybridization. *Appl Environ Microbiol* **74**: 987–993.
- 721 Raes J, Korb J, Lercher MJ, von Mering C, Bork P. (2007). Prediction of effective genome  
722 size in metagenomic samples. *Genome Biol* **8**: R10.
- 723 Ragsdale SW, Pierce E. (2008). Acetogenesis and the Wood-Ljungdahl Pathway of CO<sub>2</sub>  
724 Fixation. *Biochim Biophys Acta* **1784**: 1873–1898.
- 725 Rodionov DA, Vitreschak AG, Mironov AA, Gelfand MS. (2003). Comparative Genomics of the  
726 Vitamin B<sub>12</sub> Metabolism and Regulation in Prokaryotes. *J Biol Chem* **278**: 41148–41159.



- 727 Roth JR, Lawrence JG, Bobik TA. (1996). Cobalamin (Coenzyme B<sub>12</sub>): Synthesis and Biological  
728 Significance. *Annu Rev Microbiol* **50**: 137–181.
- 729 Sangwan I, O'Brian MR. (1991). Evidence for an Inter-organismic heme biosynthetic pathway in  
730 symbiotic soybean root nodules. *Science (80- )* **251**: 1220–1222.
- 731 Schubert HL, Raux E, Wilson KS, Warren MJ. (1999). Common chelatase design in the  
732 branched tetrapyrrole pathways of heme and anaerobic cobalamin synthesis.  
733 *Biochemistry* **38**: 10660–10669.
- 734 Seth EC, Taga ME. (2014). Nutrient cross-feeding in the microbial world. *Front Microbiol* **5**:  
735 350.
- 736 Sloan DB, Moran NA. (2012). Genome reduction and co-evolution between the primary and  
737 secondary bacterial symbionts of psyllids. *Mol Biol Evol* **29**: 3781–3792.
- 738 Stupperich E, Eisinger HJ. (1989). Biosynthesis of para-cresolyl cobamide in *Sporomusa ovata*.  
739 *Arch Microbiol* **151**: 372–377.
- 740 Taga ME, Larsen NA, Howard-Jones AR, Walsh CT, Walker GC. (2007). BluB cannibalizes  
741 flavin to form the lower ligand of vitamin B<sub>12</sub>. *Nature* **446**: 449–453.
- 742 Taga ME, Walker GC. (2010). Sinorhizobium meliloti Requires a Cobalamin-Dependent  
743 Ribonucleotide Reductase for Symbiosis with its Plant Host. *MPMI* **23**: 1643–1654.
- 744 Warren MJ, Raux E, Schubert HL, Escalante-Semerena JC. (2002). The biosynthesis of  
745 adenosylcobalamin (vitamin B<sub>12</sub>). *Nat Prod Rep* **19**: 390–412.
- 746 Waterhouse AM, Procter JB, Martin DMA, Clamp M, Barton GJ. (2009). Jalview Version 2-A  
747 multiple sequence alignment editor and analysis workbench. *Bioinformatics* **25**: 1189–  
748 1191.
- 749 Watson CJ, Schwartz S, Hawkinson V. (1945). STUDIES OF THE UROPORPHYRINS II.

- 750 FURTHER STUDIES OF THE PORPHYRINS OF THE URINE, FECES, BILE, AND  
751 LIVER IN CASES OF PORPHYRIA, WITH PARTICULAR REFERENCE TO A  
752 WALDENSTRÖM TYPE PORPHYRIN BEHAVING AS AN ENTITY ON THE  
753 TSWETT COLUMN. *J Biol Chem* **157**: 345–362.
- 754 Wienhausen G, Noriega-Ortega BE, Niggemann J, Dittmar T, Simon M. (2017). The  
755 Exometabolome of Two Model Strains of the Roseobacter Group: A Marketplace of  
756 Microbial Metabolites. *Front Microbiol* **8**: 1985.
- 757 Woodson JD, Escalante-Semerena JC. (2004). CbiZ, an amidohydrolase enzyme required for  
758 salvaging the coenzyme B<sub>12</sub> precursor cobinamide in archaea. *Proc Natl Acad Sci* **101**:  
759 3591–3596.
- 760 Xie B, Bishop S, Stessman D, Wright D, Spalding MH, Halverson LJ. (2013). Chlamydomonas  
761 reinhardtii thermal tolerance enhancement mediated by a mutualistic interaction with  
762 vitamin B<sub>12</sub>-producing bacteria. *ISME J* **7**: 1544–1555.
- 763 Yan J, Bi M, Bourdon AK, Farmer AT, Wang P-H, Molenda O, *et al.* (2018). Purinyl-cobamide  
764 is a native prosthetic group of reductive dehalogenases. *Nat Chem Biol* **14**: 8–14.
- 765 Yan J, Ritalahti KM, Wagner DD, Löffler FE. (2012). Unexpected specificity of interspecies  
766 cobamide transfer from *Geobacter* spp. to organohalide-respiring *Dehalococcoides*  
767 *mccartyi* strains. *Appl Environ Microbiol* **78**: 6630–6636.
- 768 Yi S, Seth E, Men Y, Stabler SP, Allen RH, Alvarez-Cohen L, *et al.* (2012). Versatility in  
769 corrinoid salvaging and remodeling pathways supports corrinoid-dependent metabolism  
770 in *Dehalococcoides mccartyi*. *Appl Environ Microbiol* **78**: 7745–7752.
- 771 Zallot R, Ross R, Chen WH, Bruner SD, Limbach PA, de Crécy-Lagard V. (2017). Identification  
772 of a Novel Epoxyqueuosine Reductase Family by Comparative Genomics. *ACS Chem*

773            *Biol* **12**: 844–851.

774    Zhang Y, Rodionov DA, Gelfand MS, Gladyshev VN. (2009). Comparative genomic analyses of  
775            nickel, cobalt and vitamin B<sub>12</sub> utilization. *BMC Genomics* **10**: 78.

776

777

778 **Figure Legends**

779 **Figure 1: Functions carried out by cobamide-dependent processes.** Reactions carried out by  
780 cobamide-dependent enzymes are shown on the left side of the arrows and cobamide-  
781 independent alternative processes, if known, on the right. Annotations or query genes used for  
782 searching for each function are listed in Supplementary Table 4.

783  
784 **Figure 2: Cobamide biosynthesis and structure. A.** The cobamide biosynthesis pathway is  
785 shown with each enzymatic step indicated by a white box labeled with the gene names and  
786 functional annotation. Subsections of the pathway and salvaging and remodeling pathways are  
787 bracketed or boxed with labels in bold. Orthologous enzymes that carry out similar reactions in  
788 aerobic and anaerobic corrin ring biosynthesis are indicated by dashed lines. **B.** Structure of  
789 cobalamin. The upper ligand R can be an adenosyl or methyl group. Classes of possible lower  
790 ligand structures are also shown. Benzimidazoles: R1=H, OH, CH<sub>3</sub>, OCH<sub>3</sub>; R2=H, OH, CH<sub>3</sub>,  
791 OCH<sub>3</sub>. Purines: R1=H, CH<sub>3</sub>, NH<sub>2</sub>; R2=H, NH<sub>2</sub>, OH, O. Phenolics: R=H, CH<sub>3</sub>.

792  
793 **Figure 3: Cobamide dependence in bacteria. A.** Histogram of the number of cobamide-  
794 dependent enzyme families (shown in Fig. 1, Supplementary table 4) per genome in the complete  
795 filtered data set and the four most abundant phyla in the data set. The numbers are given for bars  
796 with values less than 1%. The inset lists the mean, standard deviation, median, and mode of  
797 cobamide-dependent enzyme families for each phylum. **B.** Rank abundance of cobamide-  
798 dependent enzyme families in the filtered data set and the four most abundant phyla. The inset  
799 shows an expanded view of the nine less abundant functions. **C.** Abundance of five cobamide-  
800 dependent processes and cobamide-independent alternatives in the complete filtered data set.

801 Genomes with only the cobamide-dependent, only the cobamide-independent, or both pathways  
802 are shown for each process.

803

804 **Figure 4: Predicted cobamide biosynthesis phenotypes in the complete filtered data set and**  
805 **the four most abundant phyla in the data set.** Genomes were classified into predicted  
806 corrinoid biosynthesis phenotypes based on the criteria listed in Supplementary Table 7. The  
807 “Partial biosynthesis” category includes cobinamide salvagers and tetrapyrrole precursor  
808 auxotrophs. The “Uses cobamides” category is defined as having one or more of the cobamide-  
809 dependent enzyme families shown in Figure 1. The numbers are given for bars that are not  
810 visible.

811

812 **Figure 5: Lower ligand structure predictions. A, B.** Proportion of genomes containing the  
813 indicated lower ligand structure determinants (inner circle),  $\alpha$ -ribazole salvaging gene (inner  
814 ring), and corrinoid remodeling gene (outer ring) in the complete filtered data set separated by  
815 cobamide producer category (A) and in cobamide producers separated by phylum (B). C. The  
816 anaerobic benzimidazole biosynthesis pathway is shown with the functions that catalyze each  
817 step above the arrows. The genes required to produce each benzimidazole are shown below each  
818 structure, with the number of genomes in the complete filtered data set containing each  
819 combination of genes in parentheses. Abbreviations: AIR, aminoimidazole ribotide; 5-OHBza, 5-  
820 hydroxybenzimidazole; 5-OMeBza, 5-methoxybenzimidazole; 5-OMe-6-MeBza, 5-methoxy-6-  
821 methylbenzimidazole.

822

823 **Figure 6: Characterization of putative tetrapyrrole precursor salvagers A.** Early steps in  
824 cobamide biosynthesis. The functions that catalyze each step are indicated to the right of each  
825 arrow. The number of genomes in the complete filtered data set in each tetrapyrrole precursor  
826 salvage category is on the left. Two genomes had cobamide biosynthesis pathways inconsistent  
827 with simple auxotrophy. Specific genomes are listed in Supplementary Table 10. **B.** HPLC  
828 analysis of corrinoid extracts from *Clostridium scindens*, *Clostridium sporogenes*, and  
829 *Treponema primitia* grown with and without added ALA. A cyanocobalamin standard (10  $\mu$ M)  
830 is shown for comparison. Asterisks denote peaks with UV-Vis spectra consistent with that of a  
831 corrinoid. **C.** *T. primitia* ZAS-2 growth in 4YACo medium with and without added  
832 cyanocobalamin or ALA.

833

## 834 **Tables**

835 **Table 1. Experimentally-verified cobamide producers and their cobamide biosynthesis**  
836 **annotation content.**



842 Bold species names were identified as cobamide producers in this study (Fig. S3).

843

844 **Table 2. Presence of corrin ring marker annotations in predicted cobamide biosynthesis**

845 **categories**

|                                       | Cobamide biosynthesis category |               |                   |                                     |                                             |                       |               |                       |                                 |
|---------------------------------------|--------------------------------|---------------|-------------------|-------------------------------------|---------------------------------------------|-----------------------|---------------|-----------------------|---------------------------------|
|                                       | Cobamide producers             |               |                   |                                     | Partial biosynthesis                        |                       | Non-producers |                       |                                 |
|                                       | Very likely<br>n=1016          | Likely n=2361 | Possible<br>n=832 | All cobamide<br>producers<br>n=4209 | Tetrapyrrole<br>precursor salvager<br>n=201 | Cbi salvage<br>n=1734 | Likely n=29   | Very likely<br>n=5263 | All non-<br>producers<br>n=5292 |
| CbiL/CobI                             | 100.0*                         | 99.2          | 98.0              | 99.2                                | 87.1                                        | 8.9                   | 62.1          | 0.1                   | 0.5                             |
| CbiF/CobM                             | 100.0                          | 99.8          | 96.8              | 99.2                                | 93.5                                        | 4.7                   | 65.5          | 0.4                   | 0.6                             |
| CbiC/CobH                             | 100.0                          | 99.7          | 96.4              | 99.1                                | 99.5                                        | 5.0                   | 69.0          | 0.5                   | 0.9                             |
| CbiL/CobI and CbiF/CobM               | 100.0                          | 99.0          | 94.9              | 98.4                                | 80.6                                        | 1.3                   | 37.9          | 0.0                   | 0.2                             |
| CbiL/CobI and CbiC/CobH               | 100.0                          | 98.9          | 94.5              | 98.3                                | 89.6                                        | 4.5                   | 41.4          | 0.0                   | 0.2                             |
| CbiF/CobM and CbiC/CobH               | 100.0                          | 99.4          | 93.4              | 98.4                                | 89.6                                        | 8.2                   | 41.4          | 0.0                   | 0.3                             |
| CbiL/CobI and CbiF/CobM and CbiC/CobH | 100.0                          | 98.6          | 91.6              | 97.6                                | 76.6                                        | 0.5                   | 24.1          | 0.0                   | 0.1                             |

846

847 \*Numbers represent the percent of genomes containing each marker annotation and

848 combinations of annotations within each cobamide biosynthesis category.

849



## Carbon and nitrogen catabolism

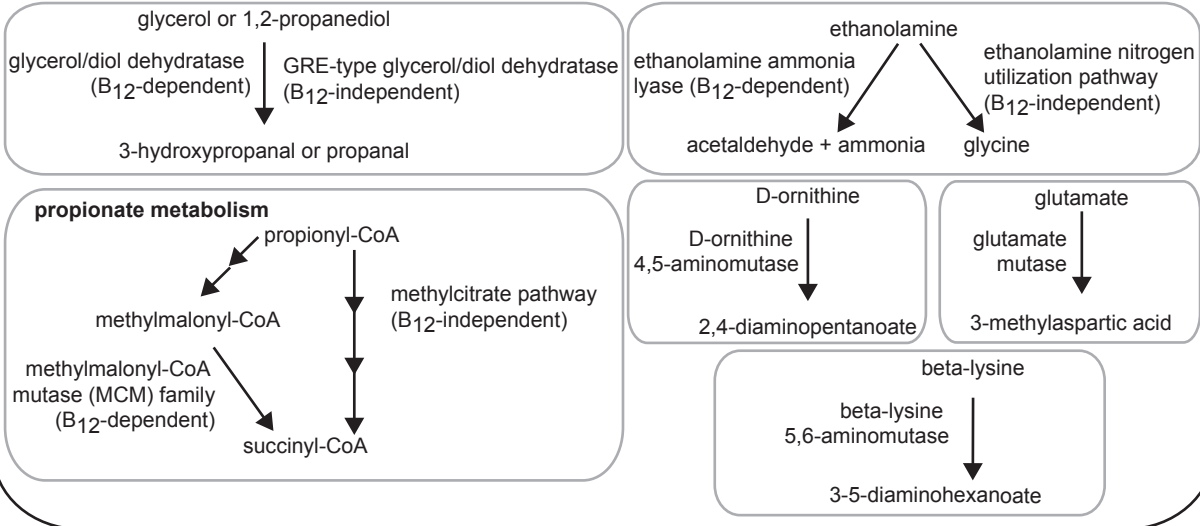

## One-carbon metabolism

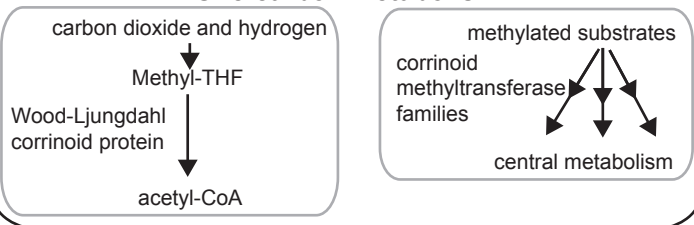

## Methionine synthesis

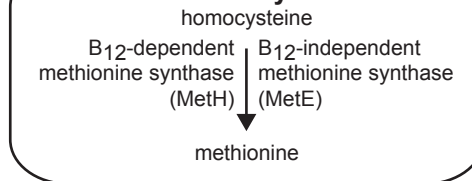

## Natural product synthesis

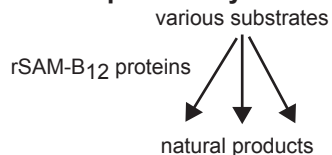

## Bacteriochlorophyll synthesis

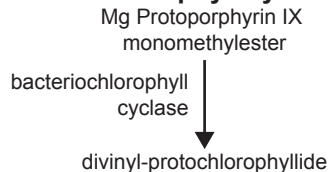

## Mercury methylation

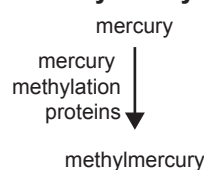

## Nucleotide Metabolism

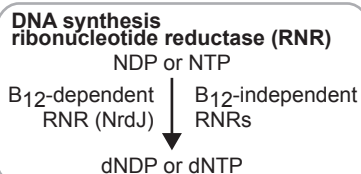

## tRNA synthesis

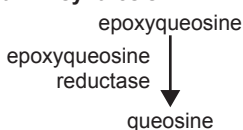

## Reductive dehalogenation

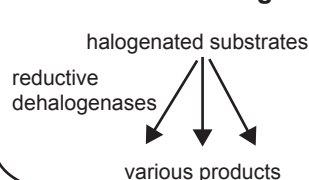

**A**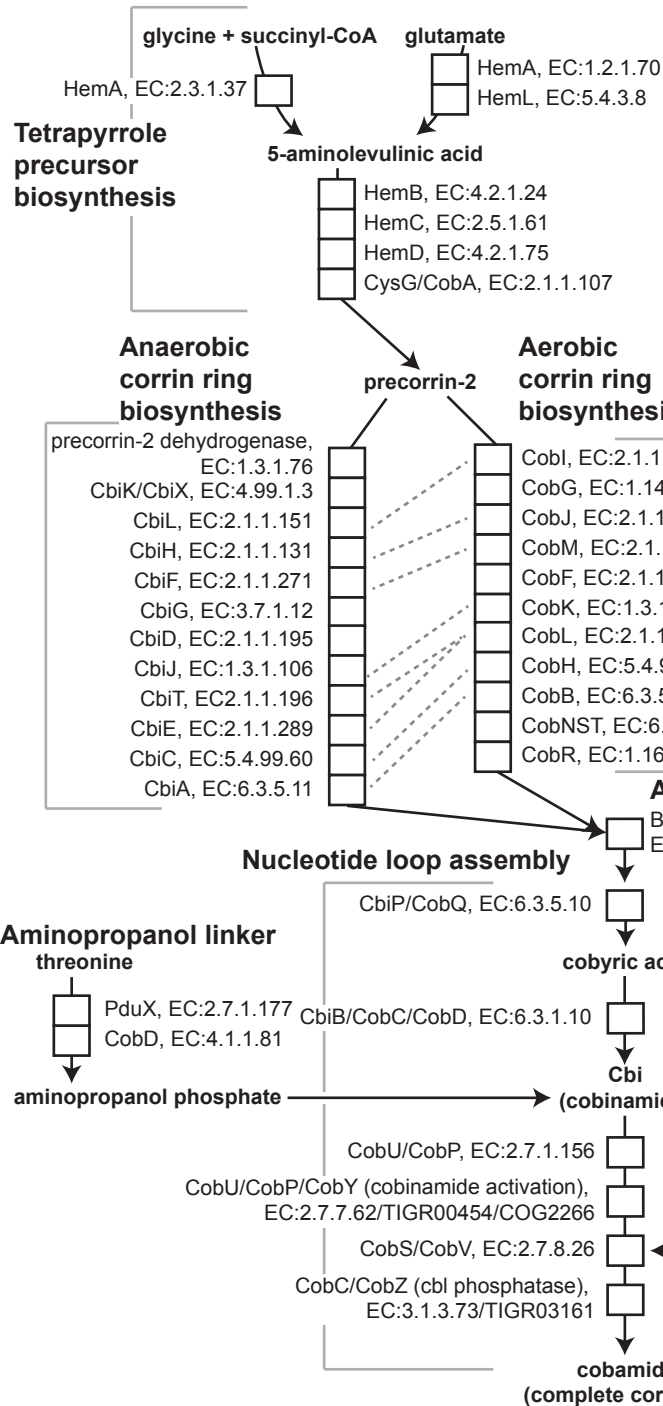**B**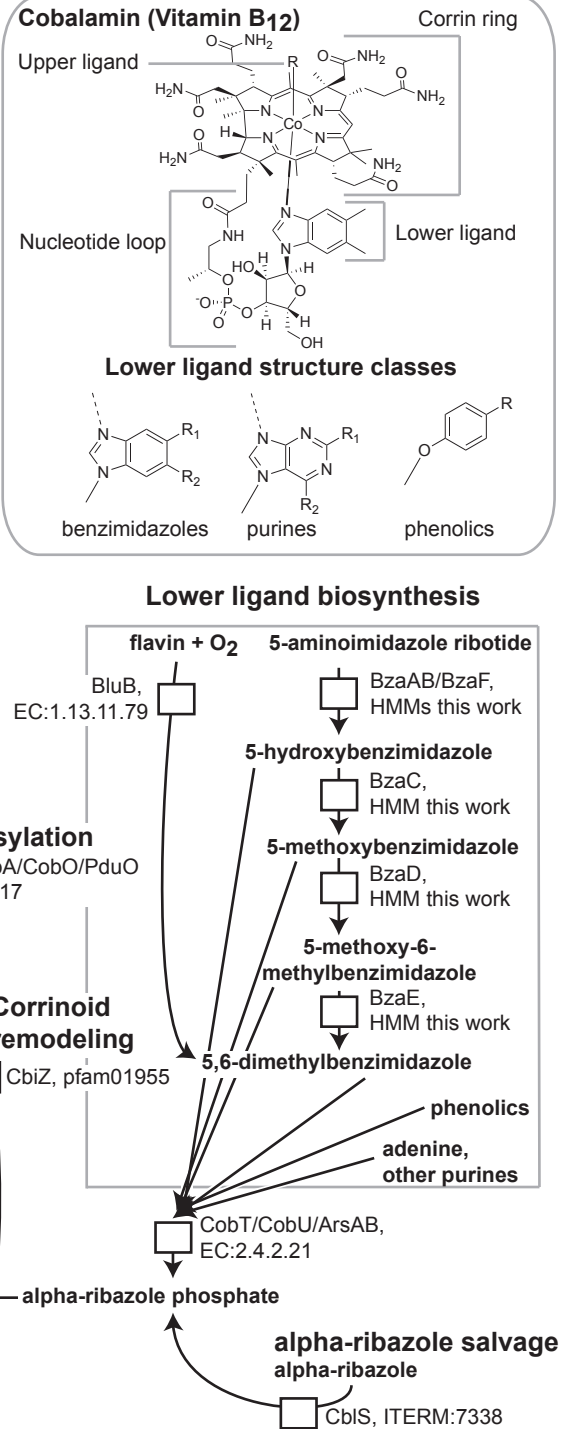

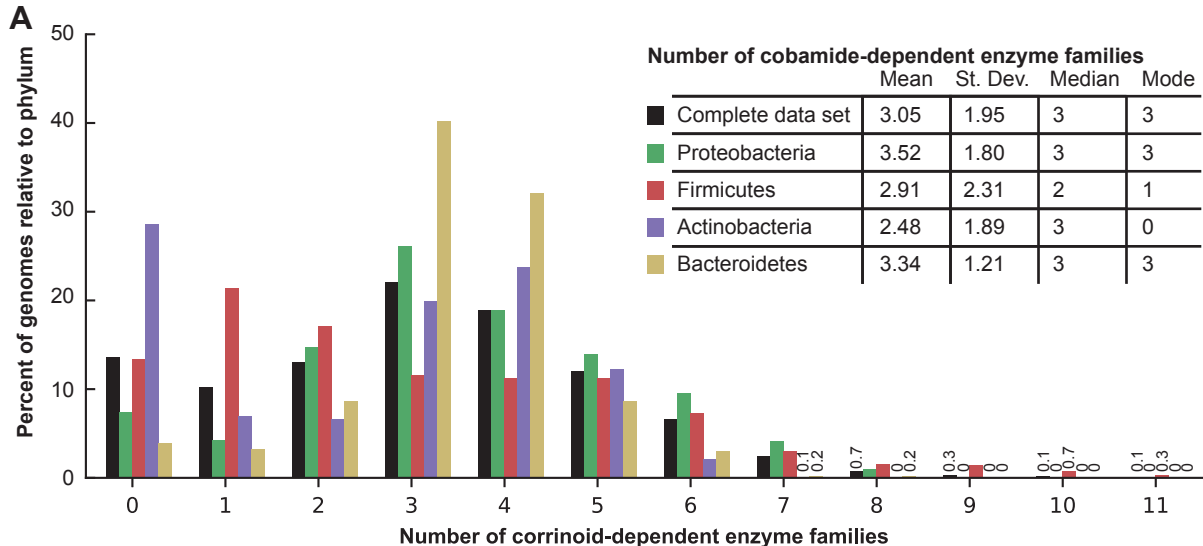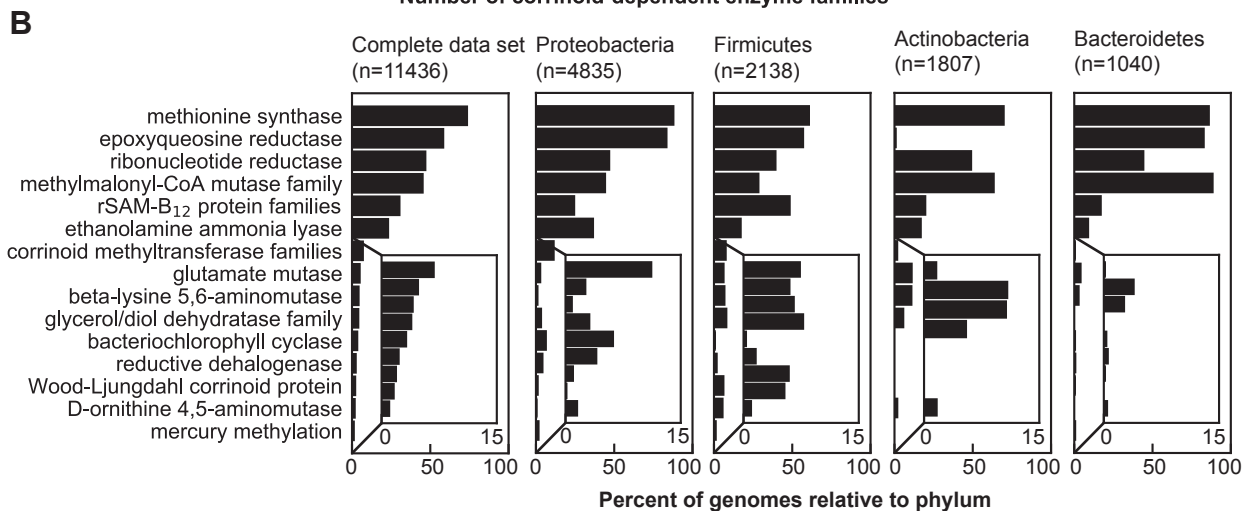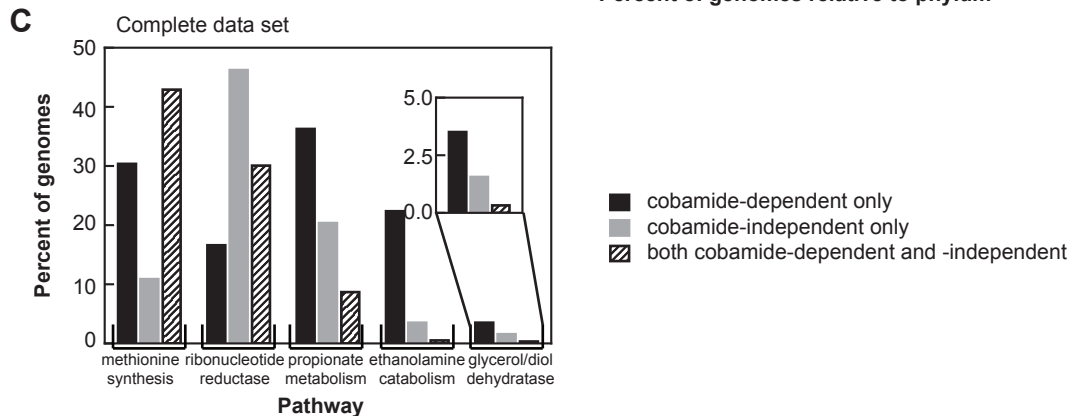

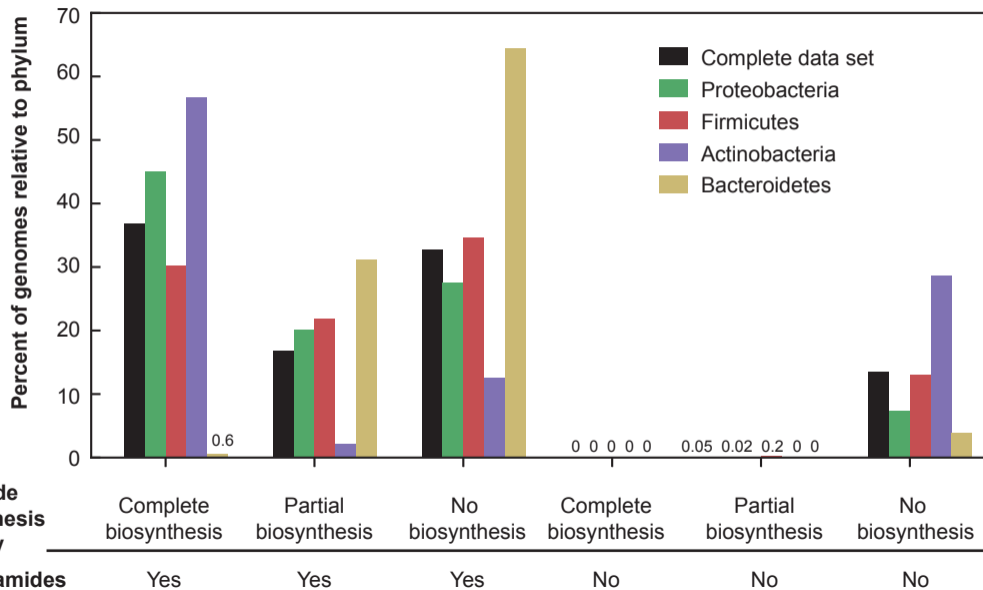

## A Complete data set

cobamide producers  
(n=4209)

partial cobamide biosynthesis  
(n=1935)

cobamide-using non-producers  
(n=3742)

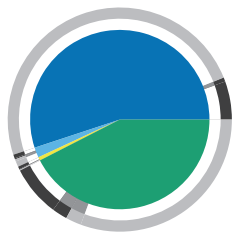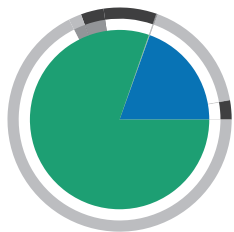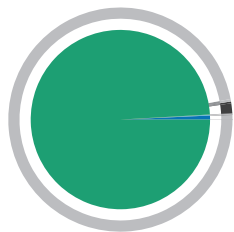

### Inner Circle

- Aerobic DMB (*bluB*)
- Anaerobic benzimidazoles (*bza*)
- Phenolic (*arsAB*)
- No lower ligand determinant

### Inner Ring

- $\alpha$ -ribazole kinase (*cbtS*)
- None

### Outer Ring

- Corrinoid remodeling protein (*cbtZ*)
- None

## B Cobamide producers

Proteobacteria  
(n=2180)

Actinobacteria  
(n=1022)

Firmicutes  
(n=646)

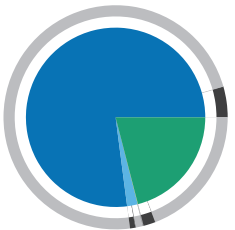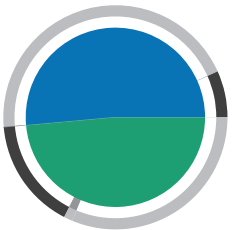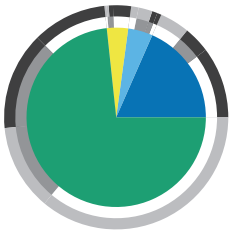

## C Anaerobic benzimidazoles in complete data set (n=96)

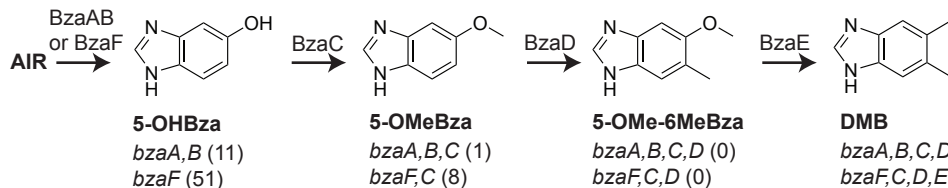

### No prediction

- bzaB* (2)
- bzaA,C,C,D,E* (1)
- bzaA,C,D,E* (1)
- bzaA,B,C,E* (2)
- bzaB,C,D,E* (1)
- bzaC,D,E* (3)
